# Supplementary material
Source: publisher figshare collection journal article supplement (https://sage.figshare.com/ndownloader/files/18531329)
Supplement: Supplementary file 1 [file 18531329]

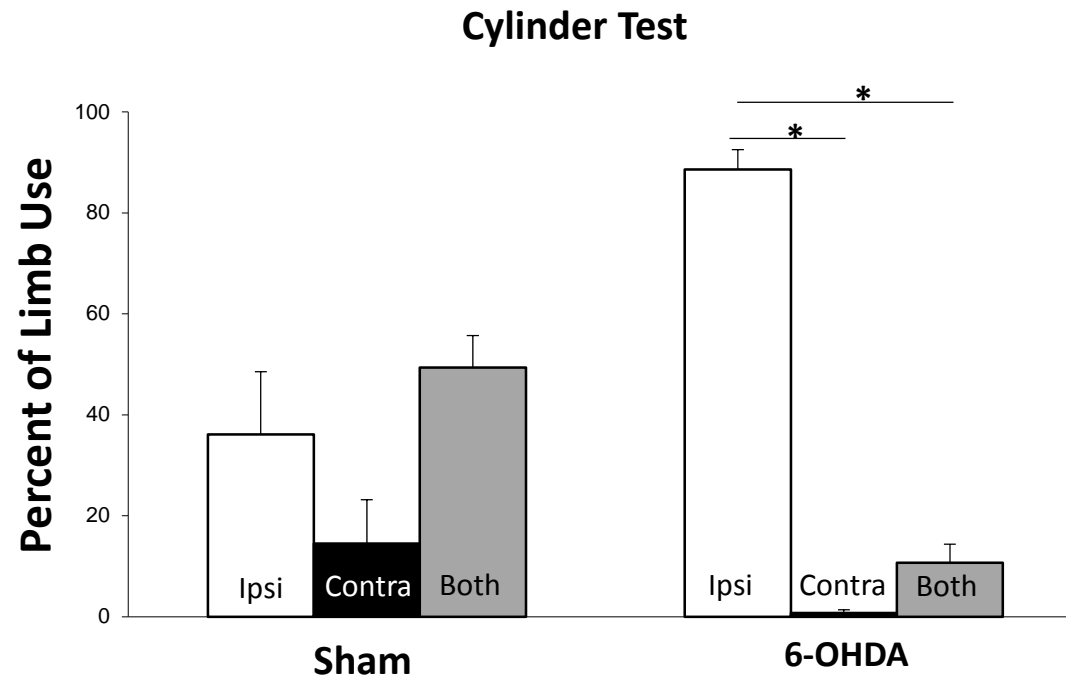

**Supplementary Figure 2:** The percentage of forelimb use during cylinder test at 2 weeks post-lesion. Values are mean  $\pm$  SEM. Ipsi, ipsilateral; Contra, contralateral; Both, both forelimbs. \*, significantly different from ipsilateral.
